# Supplementary material for: Adaptogenic and Immunomodulatory Activity of Ashwagandha Root Extract: An Experimental Study in an Equine Model
Source: Front Vet Sci. 2020 Sep 29;7:541112. doi: 10.3389/fvets.2020.541112 (PMC7552885; doi:10.3389/fvets.2020.541112)
Supplement: Supplementary file 4 [file Data_Sheet_2.xlsx]

## Sheet: Daywise_data
Albumin							W	Wilcoxon-signed Rank test value
Test of Normality (Shapiro-Wilk)							P	Obtained P-value for normality Test
		W	p				Note. Significant results suggest a deviation from normality.
DAY0	DAY15	0.857	0.251
DAY0	DAY18	0.847	0.216
DAY0	DAY21	0.773	0.062
Note. Significant results suggest a deviation from normality.
ALT
Test of Normality (Shapiro-Wilk)
		W	p
DAY0	DAY15	0.923	0.556
DAY0	DAY18	0.941	0.66
DAY0	DAY21	0.9	0.429
Note. Significant results suggest a deviation from normality.
AST
Test of Normality (Shapiro-Wilk)
		W	p
DAY0	DAY15	0.823	0.151
DAY0	DAY18	0.887	0.369
DAY0	DAY21	0.82	0.144
Note. Significant results suggest a deviation from normality.
Body Weight
Test of Normality (Shapiro-Wilk)
		W	p
DAY0	DAY15	0.844	0.206
DAY0	DAY18	0.87	0.297
DAY0	DAY21	0.868	0.29
Note. Significant results suggest a deviation from normality.
BUN
Test of Normality (Shapiro-Wilk)
		W	p
DAY0	DAY15	0.829	0.164
DAY0	DAY18	0.901	0.436
DAY0	DAY21	0.893	0.395
Note. Significant results suggest a deviation from normality.
Cortisol
Test of Normality (Shapiro-Wilk)
		W	p
DAY0	DAY15	0.713	0.016
DAY0	DAY18	0.8	0.102
DAY0	DAY21	0.736	0.028
Note. Significant results suggest a deviation from normality.
Creatinine
Test of Normality (Shapiro-Wilk)
		W	p
DAY0	DAY15	0.794	0.091
DAY0	DAY18	0.778	0.068
DAY0	DAY21	0.704	0.013
Note. Significant results suggest a deviation from normality.
Epinephrine
Test of Normality (Shapiro-Wilk)
		W	p
DAY0	DAY15	0.73	0.025
DAY0	DAY18	0.801	0.104
DAY0	DAY21	0.809	0.119
Note. Significant results suggest a deviation from normality.
Globulin
Test of Normality (Shapiro-Wilk)
		W	p
DAY0	DAY15	0.886	0.366
DAY0	DAY18	0.727	0.023
DAY0	DAY21	0.729	0.024
Note. Significant results suggest a deviation from normality.
Glucose
Test of Normality (Shapiro-Wilk)
		W	p
DAY0	DAY15	0.821	0.146
DAY0	DAY18	0.839	0.194
DAY0	DAY21	0.857	0.25
Note. Significant results suggest a deviation from normality.
GSH
Test of Normality (Shapiro-Wilk)
		W	p
DAY0	DAY15	0.699	0.011
DAY0	DAY18	0.676	0.006
DAY0	DAY21	0.657	0.003
Note. Significant results suggest a deviation from normality.
Hemoglobin
Test of Normality (Shapiro-Wilk)
		W	p
DAY0	DAY15	0.847	0.218
DAY0	DAY18	0.799	0.1
DAY0	DAY21	0.716	0.017
Note. Significant results suggest a deviation from normality.
HDL
Test of Normality (Shapiro-Wilk)
		W	p
DAY0	DAY15	0.851	0.229
DAY0	DAY18	0.876	0.323
DAY0	DAY21	0.846	0.212
Note. Significant results suggest a deviation from normality.
LDL
Test of Normality (Shapiro-Wilk)
		W	p
DAY0	DAY15	0.891	0.387
DAY0	DAY18	0.815	0.132
DAY0	DAY21	0.905	0.456
Note. Significant results suggest a deviation from normality.
IL6
Test of Normality (Shapiro-Wilk)
		W	p
DAY0	DAY15	0.692	0.009
DAY0	DAY18	0.706	0.014
DAY0	DAY21	0.689	0.009
Note. Significant results suggest a deviation from normality.
Lymphocyte
Test of Normality (Shapiro-Wilk)
		W	p
DAY0	DAY15	0.772	0.06
DAY0	DAY18	0.693	0.01
DAY0	DAY21	0.901	0.434
Note. Significant results suggest a deviation from normality.
Packed Cell Volume
Test of Normality (Shapiro-Wilk)
		W	p
DAY0	DAY15	0.896	0.414
DAY0	DAY18	0.992	0.968
DAY0	DAY21	0.992	0.969
Note. Significant results suggest a deviation from normality.
Serotonin
Test of Normality (Shapiro-Wilk)
		W	p
DAY0	DAY15	0.965	0.811
DAY0	DAY18	0.972	0.851
DAY0	DAY21	0.992	0.97
Note. Significant results suggest a deviation from normality.
SOD
Test of Normality (Shapiro-Wilk)
		W	p
DAY0	DAY15	0.794	0.091
DAY0	DAY18	0.857	0.251
DAY0	DAY21	0.787	0.081
Note. Significant results suggest a deviation from normality.
TBARS
Test of Normality (Shapiro-Wilk)
		W	p
DAY0	DAY15	0.709	0.015
DAY0	DAY18	0.833	0.176
DAY0	DAY21	0.821	0.146
Note. Significant results suggest a deviation from normality.
Total Count
Test of Normality (Shapiro-Wilk)
		W	p
DAY0	DAY15	0.913	0.5
DAY0	DAY18	0.834	0.179
DAY0	DAY21	0.904	0.452
Note. Significant results suggest a deviation from normality.
Total Erythrocyte Count
Test of Normality (Shapiro-Wilk)
		W	p
DAY0	DAY15	0.901	0.435
DAY0	DAY18	0.961	0.784
DAY0	DAY21	0.998	0.995
Note. Significant results suggest a deviation from normality.
TLC
Test of Normality (Shapiro-Wilk)
		W	p
DAY0	DAY15	0.746	0.035
DAY0	DAY18	0.845	0.21
DAY0	DAY21	0.767	0.055
Note. Significant results suggest a deviation from normality.
Total Protein
Test of Normality (Shapiro-Wilk)
		W	p
DAY0	DAY15	0.667	0.004
DAY0	DAY18	0.7	0.012
DAY0	DAY21	0.688	0.008
Note. Significant results suggest a deviation from normality.
Tryglycerides
Test of Normality (Shapiro-Wilk)
		W	p
DAY0	DAY15	0.687	0.008
DAY0	DAY18	0.671	0.005
DAY0	DAY21	0.654	0.003
Note. Significant results suggest a deviation from normality.

## Sheet: Groupwise_data
Albumin							W	Wilcoxon-signed Rank test value
Test of Normality (Shapiro-Wilk)							P	Obtained P-value for normality Test
		W	p				Note. Significant results suggest a deviation from normality.
G1	G2	0.93	0.594
G1	G3	0.712	0.016
G1	G4	0.825	0.155
G2	G3	0.814	0.13
G2	G4	0.827	0.161
G3	G4	0.789	0.084
Note. Significant results suggest a deviation from normality.
ALT
Test of Normality (Shapiro-Wilk)
		W	p
G1	G2	0.962	0.791
G1	G3	0.94	0.654
G1	G4	0.947	0.697
G2	G3	0.941	0.66
G2	G4	0.978	0.89
G3	G4	0.901	0.438
Note. Significant results suggest a deviation from normality.
AST
Test of Normality (Shapiro-Wilk)
		W	p
G1	G2	0.82	0.144
G1	G3	0.788	0.082
G1	G4	0.74	0.031
G2	G3	0.944	0.679
G2	G4	0.85	0.226
G3	G4	0.957	0.757
Note. Significant results suggest a deviation from normality.
Body Weight
Test of Normality (Shapiro-Wilk)
		W	p
G1	G2	0.74	0.031
G1	G3	0.655	0.003
G1	G4	0.722	0.02
G2	G3	0.686	0.008
G2	G4	0.749	0.038
G3	G4	0.652	0.003
Note. Significant results suggest a deviation from normality.
BUN
Test of Normality (Shapiro-Wilk)
		W	p
G1	G2	0.878	0.33
G1	G3	0.911	0.485
G1	G4	0.875	0.318
G2	G3	0.942	0.668
G2	G4	0.919	0.533
G3	G4	0.852	0.234
Note. Significant results suggest a deviation from normality.
Cortisol
Test of Normality (Shapiro-Wilk)
		W	p
G1	G2	0.919	0.531
G1	G3	0.887	0.371
G1	G4	0.933	0.615
G2	G3	0.961	0.785
G2	G4	0.783	0.075
G3	G4	0.834	0.178
Note. Significant results suggest a deviation from normality.
Creatinine
Test of Normality (Shapiro-Wilk)
		W	p
G1	G2	0.76	0.047
G1	G3	0.653	0.003
G1	G4	0.856	0.246
G2	G3	0.753	0.041
G2	G4	0.807	0.115
G3	G4	0.946	0.691
Note. Significant results suggest a deviation from normality.
Epinephrine
Test of Normality (Shapiro-Wilk)
		W	p
G1	G2	0.859	0.257
G1	G3	0.775	0.065
G1	G4	0.791	0.087
G2	G3	0.877	0.326
G2	G4	0.844	0.208
G3	G4	0.987	0.941
Note. Significant results suggest a deviation from normality.
Globulin
Test of Normality (Shapiro-Wilk)
		W	p
G1	G2	0.933	0.612
G1	G3	0.826	0.159
G1	G4	0.873	0.309
G2	G3	0.793	0.09
G2	G4	0.895	0.406
G3	G4	0.98	0.9
Note. Significant results suggest a deviation from normality.
Glucose
Test of Normality (Shapiro-Wilk)
		W	p
G1	G2	0.811	0.123
G1	G3	0.772	0.061
G1	G4	0.807	0.115
G2	G3	0.661	0.004
G2	G4	0.915	0.507
G3	G4	0.717	0.018
Note. Significant results suggest a deviation from normality.
GSH
Test of Normality (Shapiro-Wilk)
		W	p
G1	G2	0.736	0.028
G1	G3	0.787	0.081
G1	G4	0.729	0.024
G2	G3	0.971	0.85
G2	G4	0.737	0.029
G3	G4	0.878	0.332
Note. Significant results suggest a deviation from normality.
Hemoglobin
Test of Normality (Shapiro-Wilk)
		W	p
G1	G2	0.849	0.224
G1	G3	0.741	0.032
G1	G4	0.782	0.074
G2	G3	0.983	0.919
G2	G4	0.954	0.742
G3	G4	0.97	0.843
Note. Significant results suggest a deviation from normality.
HDL
Test of Normality (Shapiro-Wilk)
		W	p
G1	G2	0.703	0.012
G1	G3	0.721	0.02
G1	G4	0.674	0.006
G2	G3	0.98	0.902
G2	G4	0.671	0.005
G3	G4	0.918	0.529
Note. Significant results suggest a deviation from normality.
LDL
Test of Normality (Shapiro-Wilk)
		W	p
G1	G2	0.767	0.055
G1	G3	0.692	0.009
G1	G4	0.802	0.105
G2	G3	0.873	0.311
G2	G4	0.963	0.797
G3	G4	0.976	0.875
Note. Significant results suggest a deviation from normality.
IL6
Test of Normality (Shapiro-Wilk)
		W	p
G1	G2	0.852	0.234
G1	G3	0.816	0.134
G1	G4	0.8	0.103
G2	G3	0.948	0.704
G2	G4	0.969	0.835
Note. Significant results suggest a deviation from normality.
Lymphocyte
Test of Normality (Shapiro-Wilk)
		W	p
G1	G2	0.703	0.013
G1	G3	0.778	0.068
G1	G4	0.771	0.06
G2	G3	0.929	0.589
G2	G4	0.885	0.36
G3	G4	0.92	0.537
Note. Significant results suggest a deviation from normality.
Packed Cell Volume
Test of Normality (Shapiro-Wilk)
		W	p
G1	G2	0.965	0.808
G1	G3	0.925	0.567
G1	G4	0.992	0.966
G2	G3	0.859	0.257
G2	G4	0.872	0.306
G3	G4	0.951	0.721
Note. Significant results suggest a deviation from normality.
Serotonin
Test of Normality (Shapiro-Wilk)
		W	p
G1	G2	0.747	0.037
G1	G3	0.674	0.006
G1	G4	0.866	0.283
G2	G3	0.866	0.28
G2	G4	0.956	0.751
G3	G4	0.86	0.26
Note. Significant results suggest a deviation from normality.
SOD
Test of Normality (Shapiro-Wilk)
		W	p
G1	G2	0.844	0.208
G1	G3	0.885	0.359
G1	G4	0.853	0.235
G2	G3	0.979	0.898
G2	G4	0.917	0.519
G3	G4	0.798	0.099
Note. Significant results suggest a deviation from normality.
TBARS
Test of Normality (Shapiro-Wilk)
		W	p
G1	G2	0.647	0.002
G1	G3	0.694	0.01
G1	G4	0.728	0.023
G2	G3	0.959	0.772
G2	G4	0.891	0.389
G3	G4	0.799	0.101
Note. Significant results suggest a deviation from normality.
Total Count
Test of Normality (Shapiro-Wilk)
		W	p
G1	G2	0.772	0.061
G1	G3	0.713	0.016
G1	G4	0.836	0.183
G2	G3	0.906	0.462
G2	G4	0.992	0.965
G3	G4	0.95	0.715
Note. Significant results suggest a deviation from normality.
Total Erythrocyte Count
Test of Normality (Shapiro-Wilk)
		W	p
G1	G2	0.795	0.093
G1	G3	0.962	0.79
G1	G4	0.924	0.559
G2	G3	0.975	0.87
G2	G4	0.756	0.044
G3	G4	0.962	0.792
Note. Significant results suggest a deviation from normality.
TLC
Test of Normality (Shapiro-Wilk)
		W	p
G1	G2	0.721	0.02
G1	G3	0.675	0.006
G1	G4	0.771	0.059
G2	G3	0.987	0.942
G2	G4	0.966	0.819
G3	G4	0.954	0.741
Note. Significant results suggest a deviation from normality.
Total Protein
Test of Normality (Shapiro-Wilk)
		W	p
G1	G2	0.687	0.008
G1	G3	0.701	0.012
G1	G4	0.656	0.003
G2	G3	0.895	0.406
G2	G4	0.849	0.224
G3	G4	0.827	0.161
Note. Significant results suggest a deviation from normality.
Tryglycerides
Test of Normality (Shapiro-Wilk)
		W	p
G1	G2	0.782	0.073
G1	G3	0.822	0.148
G1	G4	0.837	0.187
G2	G3	0.967	0.823
G2	G4	0.875	0.316
G3	G4	0.998	0.993
Note. Significant results suggest a deviation from normality.
